# Supplementary material for: Developing public health risk messages about antibiotic resistance using metaphors: an international co-design and e-Delphi consensus study
Source: Sci Rep. 2026 Feb 18;16:9788. doi: 10.1038/s41598-026-40577-5 (PMC13013596; doi:10.1038/s41598-026-40577-5)
Supplement: Supplementary file 1 — Supplementary Material 1 [file 41598_2026_40577_MOESM1_ESM.xlsx]

## Sheet: Round 1
Participant number	1a. The microbial world is like a box of chocolates. Some chocolates are nice, some nasty - just like the different types of microbes.	1b. The microbial world is like a range of mushrooms - some tasty, others dangerous. Similarly, some microbes are beneficial, while others are dangerous.	1c. The microbial word is like an invisible rain forest with lots of diverse flora and fauna – invisible to the naked eye and with beautiful diversity.	1d. The microbial world is as diverse as the many types of fish in the sea. Some are lovely Nemos, other killer sharks. Similarly, some microbes are beneficial, while others are dangerous.	1e. The microbial world is like a garden that contains lots of different plants. Some plants like aggressive weeds destroy the ecosystem. Similarly, there are lots of different microbes, some of them are harmful and cause disease.	1f. The microbial world is like a microscopic orchestra with lots of different instruments, all of which play their part. Similarly, there are lots of different types of tiny microbes, all of which have essential roles.	1g. The microbial world is like chess board, where different pieces move in different ways. Together, they make up a whole team working together. Similarly, different types of microbes work in unison and are essential to the ecosystem.	1h. The microbial world is like a kaleidoscope of hidden life – beautiful and diverse.	1i. Microbes are like players in a video game – some are your friends, others are dangerous enemies.	1j. Microbes are like an army of microscopic warriors, all with different strengths and weaknesses.	1k. Microbes are diverse and can have different roles to play in maintaining the machinery of the human body. The presence of good microbes oils the body's engine and stops it going wrong. Bad microbes can put a spanner in the works.	1l. There are lots of different microbes which, like humans, have different identities and speak different languages. When treating infections, we need to speak the language of specific microbes in order to target them in the right way.	1m. The microbial world is like a complex employment setting. When at work, everyone has their own job role. Every person works to different rules or functions to make sure the overall company works. Similarly, all microbes have different roles to play.	1n. Bacteria are like a football team - players all have different roles, strengths and weakness, but all are essential to the bigger team.	2a. Each use of antibiotics puts a brick in the wall to create a barrier that prevents us from reaching bacteria in the future.	2b. Resistance is like constructing a flood barrier when it rains. Resistance is like the barrier that protects bacteria from antibiotic treatment.	2c. Resistance is like a locked door that cannot be penetrated with our current antibiotics.	2d. Having ineffective or partially effective antibiotics is like working with a blunt knife – ineffective and difficult.	2e. Resistant bacteria are like hackers breaking through security software despite the programmers trying to stop them. Resistance is the skill that enables them to escape.	2f. Resistant bacteria are like criminals wearing bulletproof vests for protection. The vests are like resistance, protecting bacteria from being caught or eliminated.	2g. Antibiotic resistance is like a scientific or industrial revolution – just like machines and technologies have been upscaled over time, so have bacteria.	2h. Drug-resistant bacteria are like artificial intelligence systems that have learned to outsmart their opponents. Just like AI systems have been upscaled over time, so have bacteria.	2i. Bacteria learn to circle the wagons (have learned to defend themselves) and unite against our antibiotic weapons.	2j. Just like weeds become resistant to weed killers so do bacteria become resistant to antibiotics.	2k. Bacteria developing resistance is like people putting on a thick winter coat to avoid getting cold. Just like a coat protects from the cold, resistance protects bacteria from being killed.	2l. Bacteria developing resistance is like people applying sun cream to avoid getting burned. Just like sun cream protects people from the sun, resistance protects bacteria from being killed.	2m. Resistant bacteria are like players from opposing teams, who have learned your strategies and built stronger defences over time, thereby becoming unbeatable.	2n. Antibiotic resistant bacteria are like soldiers, who have learned the enemy’s tactics and developed new shields and defence mechanisms against their strategies and weapons.	2o. Resistant bacteria are like war enemies that have developed armour, which cannot be penetrated by our existing antibiotics.	2p. Drug resistance is like building a fortress to retreat to when the enemy threatens (e.g., to stop arrows). Resistance is like the fortress that protects bacteria from antibiotic treatment.	2q. Resistant bacteria have developed hiding places that save them from our antibiotic attacks. Resistance is like the hideout that protects bacteria from antibiotic treatment.	2r. Resistant bacteria are like weightlifters, who have developed new levels of strength to resist ordinary drugs.	2s. Resistant bacteria are like students, who have passed their year and moved up to the next year or level.	3a. Using antibiotics to treat viral infections is like using the wrong key to unlock a door – it won’t work and you might damage the lock.	3b. Using antibiotics to treat viral infections is like using toilet cleaner on a carpet stain – it won’t work and you the risk of ruining the carpet.	3c. Using antibiotics to treat viral infections is like using water to clean paint brushes that were dipped in oil paints – futile.	3d. Using antibiotics to treat viral infections is like using water on grease stains – a pointless effort and a waste of time.	3e. Using antibiotics to treat viral infections is like using a pencil to write an email – inappropriate and potentially harmful.	3f. Using antibiotics to treat viral infections is like using a leaky bucket to carry water – the water will pass through and you are left with nothing. It’s a futile waste of resources.	3g. Using antibiotics to treat viral infections is like eating soup with a fork – using the wrong tool is pointless.	3h. Using antibiotics to treat viral infections is like a woman using a man’s urinal – pointless and ridiculous.	3i. Using antibiotics to treat viral infections is like placing an electric kettle on a fire – inappropriate and harmful.	3j. Using antibiotics to treat viral infections is like watering a plastic plant – it superficially looks like the right thing to do but is ultimately pointless.	3k. Using antibiotics to treat viruses is like giving chocolate to a person with lactose intolerance – it seems like a nice idea but ultimately makes them sick.	3l. Using antibiotics to treat viruses is like using your tooth brush to clean your ears –inappropriate.	3m. Using antibiotics to treat viral infections is like connecting the wrong pieces in a game of dominoes – they just don’t work together.	3n. Some of your weapons only work against a particular type of opponent in video games – just as antibiotics only work against bacterial infections.	3o. Using antibiotics to treat viral infections is like using a bandage to treat a stomach ache – it seems like a good idea, but doesn’t get to the source of the problem and is ultimately futile.	3p. Using antibiotics to treat viral infections is like using aftershave on sunburned skin – using an inappropriate product only leads to harm.
1	1	1	3	3	3	3	1	1	1	8	6	7	3	3	7	1	7	7	1	4	8	7	5	3	6	4	6	7	8	1	7	5	1	7	2	6	6	7	8	8	1	1	2	2	2	6	7	7	1
2	5	9	5	9	9	3	3	3	9	5	9	9	4	5	4	4	9	7	6	6	7	9	9	9	9	6	8	9	9	8	2	8	8	9	9	9	9	3	9	9	1	9	9	4	9	9	3	5	5
3	9	8	2	6	8	1	1	2	9	2	6	2	1	1	1	4	4	8	8	8	8	8	8	9	7	7	9	9	8	3	2	2	1	9	8	5	4	1	2	2	1	1	2	1	1	3	7	6	6
4	4	6	4	5	6	5	3	2	5	3	7	6	3	4	4	5	4	3	5	6	4	4	5	5	4	4	6	7	7	5	5	4	5	8	7	5	7	3	3	4	3	6	6	3	4	4	6	5	6
5	8	8	7	8	8	7	5	5	7	5	5	6	6	6	6	5	9	8	3	7	3	3	9	4	7	6	7	8	8	6	5	4	3	9	8	6	7	6	7	8	3	5	7	2	9	6	7	5	5
6	3	4	1	4	2	2	3	1	3	4	3	5	3	2	5	2	5	5	4	6	2	4	2	2	2	4	5	5	5	4	1	4	4	6	3	2	2	1	1	1	1	1	1	1	1	1	3	1	1
7	6	9	3	9	9	5	4	4	9	4	7	6	5	5	6	4	4	7	6	7	3	4	8	8	7	7	7	9	8	8	5	5	4	9	9	7	7	5	6	7	6	6	8	6	7	5	7	6	7
8	3	8	6	7	5	3	2	4	7	6	6	2	5	8	1	1	6	6	5	7	2	2	1	2	7	7	5	4	4	4	2	3	2	4	3	4	5	6	3	5	2	4	5	2	5	2	6	5	6
9	4	8	8	9	4	3	3	3	4	3	5	6	6	4	3	6	6	3	4	4	3	3	3	8	5	4	6	3	3	4	6	3	3	8	3	5	5	6	3	8	3	4	4	2	6	2	7	8	4
10	1	7	2	1	6	2	2	5	6	2	7	8	2	2	1	4	7	1	3	7	1	4	2	7	7	6	8	4	8	5	1	3	1	6	5	6	7	2	1	1	1	5	1	5	3	3	8	7	2
11	7	5	7	8	5	7	3	4	3	1	2	9	3	4	1	4	3	3	5	3	4	3	4	7	6	7	5	6	4	7	3	8	1	6	5	3	2	1	3	6	1	1	7	1	4	4	6	4	7
12	9	9	8	9	7	8	6	9	7	3	3	9	5	4	8	9	5	9	7	9	7	9	3	9	9	9	8	9	5	6	5	4	4	9	9	9	6	9	6	6	5	9	7	9	7	9	8	7	6
13	8	7	7	6	7	6	5	5	5	5	6	6	4	4	3	2	6	6	4	7	6	6	4	7	8	8	8	7	6	4	3	3	2	8	6	4	5	4	5	6	2	2	5	2	3	2	5	4	5
14	5	5	5	4	6	6	6	6	4	4	5	6	6	6	8	7	5	7	6	7	8	6	7	7	6	8	6	6	6	5	5	6	6	7	7	5	6	5	7	6	8	6	8	6	5	5	6	6	4
15	3	7	8	5	5	8	6	3	6	3	3	6	7	8	2	8	7	8	2	4	2	4	2	6	7	3	4	3	7	2	8	9	3	9	2	5	6	1	3	6	2	5	3	2	8	2	3	8	8
16	4	6	1	1	2	3	1	5	1	1	3	6	2	2	2	7	1	8	2	8	2	2	1	2	8	8	5	3	2	2	1	8	2	7	3	3	6	1	8	9	1	3	7	1	3	3	2	2	4
17	7	7	8	8	8	2	2	2	7	6	6	5	3	1	5	5	8	8	7	8	5	4	5	8	9	9	8	8	8	7	5	8	6	6	5	7	3	1	9	1	1	4	9	2	1	9	7	8	5
18	3	3	4	4	4	3	4	6	5	3	4	5	5	5	3	3	2	5	4	4	4	4	3	7	5	5	5	5	4	2	4	6	3	6	6	5	5	7	4	7	1	3	3	3	3	2	2	2	2
19	6	7	4	7	8	4	3	3	8	3	8	7	6	3	3	3	8	5	8	8	8	8	7	8	9	5	9	9	6	6	6	3	3	9	3	4	5	3	9	9	2	4	9	3	4	2	9	2	3
20	9	7	6	9	8	5	5	3	8	5	9	5	4	5	5	6	6	6	6	7	4	7	3	7	7	4	7	8	8	5	5	7	8	9	7	6	7	9	9	9	5	5	9	4	9	6	5	7	8
21	2	5	3	4	4	3	3	2	2	2	7	6	5	4	6	4	3	3	4	3	3	4	6	3	3	4	4	4	4	4	4	4	4	4	5	4	4	4	4	4	2	3	4	4	3	3	2	3	3
22	5	4	5	3	8	5	4	3	6	5	4	3	3	5	6	3	5	5	4	4	5	4	4	6	5	6	6	6	6	4	4	5	4	7	5	4	4	4	3	5	2	4	5	4	3	3	4	6	5
23	6	4	3	4	4	6	4	4	6	6	4	4	4	7	3	4	6	6	4	7	3	4	3	7	4	6	3	6	6	5	4	5	4	4	6	5	5	3	3	6	2	4	3	3	6	3	3	5	3
24	4	7	2	6	6	2	3	1	7	4	4	7	4	5	3	3	5	2	4	6	3	2	6	5	3	4	7	7	4	3	3	6	3	7	3	2	4	1	7	7	1	6	2	2	6	3	6	5	2
25	3	5	4	4	3	4	4	4	3	3	3	6	2	2	3	3	4	4	2	2	2	2	1	5	3	3	2	3	4	3	3	2	2	2	1	1	1	3	3	3	1	3	1	1	2	1	1	4	2
26	5	9	8	9	8	8	9	8	8	8	9	9	8	7	7	8	9	8	9	9	8	8	6	5	8	9	9	9	8	8	7	8	6	9	9	9	9	6	8	8	5	8	9	9	9	8	8	9	6
27	6	4	2	3	5	2	5	5	3	1	7	6	7	7	3	3	3	1	4	1	4	3	1	6	6	6	4	2	1	4	6	5	3	7	3	6	6	4	8	6	1	1	8	1	1	3	4	5	2
28	2	2	3	3	4	3	2	2	3	3	3	4	3	3	3	2	2	2	2	2	3	3	2	2	2	2	3	3	2	2	2	2	2	3	3	3	3	2	2	3	2	2	2	2	3	2	2	2	2
29	3	8	5	8	4	4	3	5	7	3	6	5	4	4	3	3	3	5	5	5	4	5	3	7	3	3	6	5	4	4	4	4	4	6	3	5	5	2	5	6	2	4	3	4	3	2	5	7	5
30	1	8	6	7	7	5	4	5	8	3	8	3	5	5	6	1	2	6	6	2	1	1	2	5	1	2	7	5	5	5	1	2	4	7	5	5	5	5	3	8	1	5	6	3	8	4	4	7	1
31	4	4	7	4	4	6	3	2	5	8	6	4	7	5	3	3	8	6	4	7	5	5	5	5	9	6	6	5	8	7	6	5	2	8	4	9	9	5	7	9	4	9	9	3	6	5	6	4	6
32	3	6	5	7	6	5	7	7	8	6	6	6	4	8	1	4	6	5	7	6	5	5	3	7	4	6	6	7	6	5	8	8	1	6	5	7	5	7	4	8	5	2	6	4	8	5	4	3	6
33	2	2	5	4	5	3	2	4	5	2	3	6	3	2	2	2	2	4	5	3	2	3	2	7	5	3	7	5	6	3	2	3	3	4	4	4	5	3	3	5	1	2	5	2	2	1	2	3	2
34	4	4	6	6	7	6	6	6	4	4	5	8	6	5	4	6	6	6	5	4	4	4	4	7	6	6	6	6	6	5	5	5	5	8	7	7	7	6	5	5	3	4	4	4	4	4	7	6	5
35	6	9	7	8	7	5	4	4	6	4	5	6	7	7	1	8	9	9	9	9	7	8	7	9	9	9	9	9	9	9	9	8	3	9	9	9	9	8	9	9	7	7	8	7	7	7	9	7	8
36	6	5	4	4	5	5	5	4	5	3	7	3	3	4	5	2	3	3	6	3	5	7	6	6	7	5	6	2	1	1	6	8	5	5	6	3	4	2	2	7	1	3	6	5	4	3	3	6	3
37	3	6	6	5	5	4	4	4	6	7	4	6	5	6	3	3	3	6	3	3	5	6	5	6	5	6	6	5	5	6	6	6	4	8	6	6	6	8	8	8	4	7	7	4	7	5	5	5	5
[truncated: 40 more columns]

## Sheet: Round 2
Participant number	1a. The world of germs is a box of chocolates - some nice, others nasty.Comment: Some participants commented that most chocolates are nice and that it’s hard to imagine truly nasty ones.The panel median rating for this item was 4. Your previous rating for this item was [DELPHIPREVIOUS].	1b. Some germs are good, others dangerous—just like mushrooms. The panel median rating for this item was 6.5. Your previous rating for this item was [DELPHIPREVIOUS].	1c. The world of germs is a hidden jungle of life, filled with both predators and protectors. The panel median rating for this item was 5. Your previous rating for this item was [DELPHIPREVIOUS].	1d. The world of germs is as diverse as the many types of fish in the sea. Some are lovely Nemos, other killer sharks. The panel median rating for this item was 6. Your previous rating for this item was [DELPHIPREVIOUS].	1e. The world of germs is a garden with both flowers and weeds. The panel median rating for this item was 6. Your previous rating for this item was [DELPHIPREVIOUS].	1f. The world of germs forms a microscopic orchestra—each plays a role.Comment: Some participants warned that orchestras may not be universally known or understood. Some also worried it might romanticise microbes. The panel median rating for this item was 4.5. Your previous rating for this item was [DELPHIPREVIOUS].	1g. The world of germs is a chess board, with different pieces working as a team.Comment: comment: Some participants warned that chess may not be universally known or understood.The panel median rating for this item was 4. Your previous rating for this item was [DELPHIPREVIOUS].	1h. The world of germs is a living kaleidoscope. Comment: Some participants thought this metaphor was straight forward and had potential for nice visualisations. Others worried that kaleidoscopes may not be universally known. Some also worried it might romanticise microbes. The panel median rating for this item was 4. Your previous rating for this item was [DELPHIPREVIOUS].	1i. Germs are video game characters—some allies, some foes.Comment: Participants thought this metaphor might catch the eye of younger audiences, but that it also risks turning microbes into just enemies or allies, oversimplifying a complex ecosystem. The panel median rating for this item was 6. Your previous rating for this item was [DELPHIPREVIOUS].	1k. Germs keep the body’s engine running—or can break it down. The panel median rating for this item was 6. Your previous rating for this item was [DELPHIPREVIOUS].	1l. Germs have different identities and speak many different languages.Comment: Some participants commented that this metaphor captured the situation accurately from a purely medical and microbiology perspective. Participants also liked that it directly referred to the human condition, making it relatable. The panel median rating for this item was 6. Your previous rating for this item was [DELPHI…	1j. Germs are microscopic warriors with different strengths and weaknesses.Comment: Some participants warned against the use of war metaphors.The panel median rating for this item was 4. Your previous rating for this item was [DELPHIPREVIOUS].	1m.The world of germs is a workplace—each germ has a job. The panel median rating for this item was 4. Your previous rating for this item was [DELPHIPREVIOUS].	1n. Germs are a football team—different roles, one goal.Comment: Some participants commented that this metaphor may not work so well for people who don’t like sports. The panel median rating for this item was 4.5. Your previous rating for this item was [DELPHIPREVIOUS].	2b.Antibiotic resistance is a flood barrier blocking treatment. The panel median rating for this item was 4. Your previous rating for this item was [DELPHIPREVIOUS].	2c. Antibiotic resistance is a locked door that cannot be penetrated with our current antibiotics.Comment: Participants commented that this metaphor may create a misunderstanding that there is "one resistance", whereas we have bacteria that are resistant against one type of antibiotics but sensitive to another. The panel median rating for this item was 5. Your previous rating for this item was [D…	2d. Ineffective antibiotics are blunt tools. The panel median rating for this item was 6. Your previous rating for this item was [DELPHIPREVIOUS].	2e. Antibiotic-resistant bacteria are hackers breaking through security. The panel median rating for this item was 5. Your previous rating for this item was [DELPHIPREVIOUS].	2f. Antibiotic resistance is a bulletproof vest for bacteria. The panel median rating for this item was 6. Your previous rating for this item was [DELPHIPREVIOUS].	2g. Antibiotic resistance is an industrial revolution where bacteria level up.Comment: Participants warned this metaphor may be less intuitive, potentially weakening its immediate impact for general audiences. The panel median rating for this item was 4. Your previous rating for this item was [DELPHIPREVIOUS].	2h. Antibiotic-resistant bacteria are Artificial Intelligence that has outsmarted us. The panel median rating for this item was 4. Your previous rating for this item was [DELPHIPREVIOUS].	2i. Bacteria learn to circle the wagons and unite against our antibiotic weapons.Comment: Some participants warned against the use of war metaphors The panel median rating for this item was 4. Your previous rating for this item was [DELPHIPREVIOUS].	2j. Drug-resistant bacteria are tough weeds that survive weed killer. The panel median rating for this item was 7. Your previous rating for this item was [DELPHIPREVIOUS].	2k. Antibiotic resistance is a thick protective coat for bacteria that blocks antibiotics. The panel median rating for this item was 6. Your previous rating for this item was [DELPHIPREVIOUS].	2l. Antibiotic resistance is protective sunblock for bacteria. The panel median rating for this item was 6. Your previous rating for this item was [DELPHIPREVIOUS].	2m. Antibiotic-resistant bacteria are opponent players, who have learned your strategies and become unbeatable. The panel median rating for this item was 6. Your previous rating for this item was [DELPHIPREVIOUS].	2o. Antibiotic-resistant bacteria are war enemies with impenetrable armour.Comment: Some participants warned against the use of war metaphors. The panel median rating for this item was 6. Your previous rating for this item was [DELPHIPREVIOUS].	2p. Antibiotic resistance is an impenetrable fortress that protects bacteria from antibiotic treatment.Comment: Some participants warned audiences might associate positive connotations of “fortress” and “protect” with resistance and may not understand that resistance is a dangerous, growing threat. The panel median rating for this item was 4.5. Your previous rating for this item was [DELPHIPREVIO…	2q. Antibiotic resistance is a hideout for bacteria to avoid antibiotics.Comment: Some participants warned that this might give the impression that the bacteria are dormant (like Herpes or HIV...). The panel median rating for this item was 4.5. Your previous rating for this item was [DELPHIPREVIOUS].	2r. Antibiotic-resistant bacteria are weightlifters, who have developed new levels of strength to resist ordinary drugs.Comment: Some participants liked how this metaphor conveyed strength without including references to war. The panel median rating for this item was 5. Your previous rating for this item was [DELPHIPREVIOUS].	3a. Using antibiotics for viruses is using the wrong key to unlock a door. The panel median rating for this item was 7. Your previous rating for this item was [DELPHIPREVIOUS].	3b. Using antibiotics for viruses is like using toilet cleaner on carpet.Comment: Some participants questioned whether this metaphor would be universally understood. The panel median rating for this item was 5. Your previous rating for this item was [DELPHIPREVIOUS].	3c. Using antibiotics for viruses is like rinsing oil paint with water.Comment: Some participants questioned whether this metaphor would be universally understood. The panel median rating for this item was 5. Your previous rating for this item was [DELPHIPREVIOUS].	3d. Using antibiotics on viruses is like water on grease.Comment: Some participants questioned whether this metaphor would be universally understood. The panel median rating for this item was 5. Your previous rating for this item was [DELPHIPREVIOUS].	3e. Using antibiotics for viruses is writing an email with a pencil.Comment: Some participants stated that it wasn’t clear why it would be harmful to write an e-mail with a pencil. The panel median rating for this item was 4. Your previous rating for this item was [DELPHIPREVIOUS].	3f. Using antibiotics for viruses is using a leaky bucket. The panel median rating for this item was 4.5. Your previous rating for this item was [DELPHIPREVIOUS].	3g. Using antibiotics for viruses is eating soup with a fork. The panel median rating for this item was 6. Your previous rating for this item was [DELPHIPREVIOUS].	3i. Using antibiotics for viruses is placing an electric kettle on a fire to heat. The panel median rating for this item was 4. Your previous rating for this item was [DELPHIPREVIOUS].	3j. Using antibiotics for viruses is watering fake plants.The panel median rating for this item was 5.5. Your previous rating for this item was [DELPHIPREVIOUS].	3l. Using antibiotics for viruses is brushing ears with a toothbrush.Comment: Some participants found this metaphor too vulgar.The panel median rating for this item was 4. Your previous rating for this item was [DELPHIPREVIOUS].	3n. Using antibiotics for viruses is using the wrong type of weapon against a video game opponent. The panel median rating for this item was 5.5. Your previous rating for this item was [DELPHIPREVIOUS].	3o. Using antibiotics for viruses is like using a bandage for a stomach ache.Comment: Some participants questioned whether this metaphor would be universally understood. The panel median rating for this item was 5. Your previous rating for this item was [DELPHIPREVIOUS].	3p. Using antibiotics for viruses is like using aftershave on sunburn.Comment: Some participants questioned whether this metaphor would be universally understood. The panel median rating for this item was 5. Your previous rating for this item was [DELPHIPREVIOUS].	3q. Using antibiotics for viruses is like putting diesel in a petrol car.Comment: Some participants felt this metaphor was particularly relatable, others questioned its universality. The panel median rating for this item was 6.5. Your previous rating for this item was [DELPHIPREVIOUS].	3r. Using antibiotics for viruses is using the wrong weed killer on garden pests. The panel median rating for this item was 5.5. Your previous rating for this item was [DELPHIPREVIOUS].	3s. Using antibiotics for viruses is speaking the wrong language.Comment: Some participants thought the human element made this metaphor relatable.The panel median rating for this item was 5. Your previous rating for this item was [DELPHIPREVIOUS].	3t. Using antibiotics for viruses calling someone the wrong name.Comment: Some people liked the humorous angle of this metaphor but felt that it wasn’t actually harmful if you call someone by the wrong name.The panel median rating for this item was 6. Your previous rating for this item was [DELPHIPREVIOUS].	3u. Using antibiotics for viruses is sending a guard after an invisible enemy.The panel median rating for this item was 4. Your previous rating for this item was [DELPHIPREVIOUS].	3v. Using antibiotics for viruses is like sending your guard on the wrong path after an enemy.The panel median rating for this item was 4. Your previous rating for this item was [DELPHIPREVIOUS].
1	1	1	2	3	3	3	4	1	1	6	6	8	3	3	1	7	7	1	4	8	7	5	3	6	4	6	8	1	7	5	7	2	6	6	7	8	8	1	2	2	7	7	1	5	1	7	7	7	7
2	2	8	9	8	8	2	2	2	2	8	8	2	2	2	2	8	2	2	8	2	2	2	8	8	8	8	2	2	2	8	8	2	2	2	2	2	8	2	2	2	2	2	2	2	2	2	2	2	2
3	2	8	5	6	7	2	1	2	9	6	4	5	3	3	3	4	7	8	8	6	4	5	9	8	7	7	8	2	2	4	9	7	5	4	1	1	2	1	3	1	7	6	6	8	7	8	7	2	6
4	3	7	4	4	6	3	3	2	6	7	6	4	4	4	4	3	5	5	6	4	4	4	6	5	5	6	6	4	4	4	8	5	4	7	2	3	4	4	5	4	6	6	5	7	5	6	4	4	4
5	6	7	6	7	6	5	4	3	7	5	5	4	5	5	5	8	8	4	7	3	3	7	6	7	6	7	7	6	5	4	9	6	5	6	4	6	8	4	7	7	7	5	5	6	5	5	6	4	4
6	3	5	4	4	5	2	2	1	4	6	7	3	3	2	3	6	1	6	7	2	4	2	2	6	5	6	6	4	3	3	8	3	2	4	1	2	4	1	4	1	2	6	1	1	1	6	4	1	2
7	3	9	3	9	7	2	2	2	2	2	2	2	2	2	2	4	2	2	2	2	2	5	9	6	7	2	6	3	3	3	9	4	4	4	4	4	8	2	8	2	3	5	3	5	6	5	5	4	2
8	3	7	5	6	5	3	2	4	7	6	5	5	5	6	2	6	6	5	7	3	3	1	6	6	6	6	4	4	3	5	6	4	4	5	5	3	6	4	6	4	6	5	5	7	5	4	4	5	4
9	2	8	6	8	2	2	2	2	2	6	7	2	2	2	2	2	5	2	3	1	1	1	8	6	6	3	2	2	2	2	8	2	2	2	2	2	6	5	4	2	3	2	2	7	7	7	2	2	2
10	2	7	3	1	6	3	2	5	6	7	7	2	3	3	4	6	3	3	7	2	4	3	7	7	6	8	7	4	2	3	6	5	6	6	2	2	3	5	2	3	6	6	2	7	8	7	3	1	5
11	3	2	8	8	8	9	1	1	2	1	9	1	3	2	2	1	2	8	2	2	1	2	9	2	7	2	2	2	1	9	9	2	1	1	1	2	7	1	8	2	8	1	2	8	2	9	7	1	2
12	6	7	6	7	7	6	6	6	7	5	7	3	5	5	7	5	8	6	7	6	6	3	8	8	7	7	6	6	5	5	8	7	7	6	5	6	6	6	6	6	7	6	6	8	7	7	7	6	6
13	5	7	7	5	7	5	5	5	5	6	6	4	4	4	3	6	6	5	6	4	4	4	7	6	6	7	6	4	3	6	8	4	4	4	3	3	5	2	4	3	4	4	4	5	5	5	5	4	3
14	4	8	5	3	6	8	7	6	2	2	3	7	2	8	7	4	7	7	4	2	8	5	8	8	6	6	6	5	6	6	7	7	4	4	4	5	6	7	8	6	7	7	5	5	5	4	4	7	7
15	3	7	7	4	5	5	5	3	6	3	6	3	5	6	7	4	7	3	4	2	4	2	6	7	3	4	6	3	7	9	9	2	5	6	2	2	6	4	4	6	3	7	6	7	7	4	5	5	3
16	6	6	2	1	2	3	2	5	3	7	8	1	2	1	5	8	8	2	8	2	2	1	2	7	7	8	5	2	2	8	7	2	2	5	1	1	5	3	7	3	2	4	4	3	1	5	2	1	4
17	4	6	5	6	6	4	4	4	7	6	5	6	3	1	4	6	6	6	6	4	4	4	7	7	5	7	7	5	5	6	6	5	6	4	2	5	4	4	7	3	6	7	5	7	7	5	8	5	6
18	2	3	4	4	4	5	4	6	5	5	5	3	4	5	3	3	5	5	5	3	4	3	6	5	5	5	4	3	4	4	6	6	5	5	6	5	7	6	7	5	4	5	4	6	5	6	5	4	4
19	2	2	2	2	8	1	1	1	2	8	9	2	2	8	2	8	2	2	8	2	8	2	8	8	2	8	2	2	2	8	9	1	1	1	1	9	2	1	2	1	2	1	1	9	8	9	2	1	2
20	5	7	6	8	8	5	5	4	7	8	6	4	4	5	5	6	6	6	7	4	6	3	7	6	6	7	8	5	5	7	9	6	5	5	5	5	7	5	9	9	5	6	6	8	6	8	6	5	5
21	3	5	7	5	4	3	3	2	4	7	6	3	5	3	4	3	5	4	4	3	4	5	3	5	5	4	5	4	4	5	4	6	3	4	4	4	4	3	3	4	3	3	4	3	3	5	2	4	5
22	2	2	7	3	8	2	2	2	3	2	3	3	2	2	2	2	6	6	6	3	3	2	6	6	6	6	6	3	3	3	7	6	6	6	3	3	3	3	6	3	3	3	3	4	6	4	3	3	3
23	6	5	4	4	4	5	4	4	6	4	5	4	4	6	4	5	6	5	7	3	4	3	7	5	6	3	6	5	4	5	7	5	5	5	3	3	6	4	5	5	3	5	3	8	5	3	4	4	4
24	3	8	2	8	3	3	3	1	7	7	8	2	3	2	3	8	6	2	8	2	2	7	7	7	3	7	6	8	2	8	7	3	2	2	1	7	7	7	2	6	6	3	2	7	3	1	2	2	7
25	3	5	3	4	3	3	3	3	3	4	5	3	2	2	2	4	5	2	2	2	2	1	6	4	4	3	4	4	3	2	3	2	1	2	3	3	3	3	3	2	1	5	1	1	2	3	2	2	3
26	3	7	7	7	8	4	7	6	6	7	8	6	6	5	5	4	8	7	7	5	5	6	8	8	8	8	7	5	5	8	9	4	7	7	4	7	9	6	7	4	5	7	4	5	6	9	8	6	5
27	3	2	4	6	2	3	4	4	5	6	6	1	7	7	3	3	1	4	2	3	2	1	7	7	6	5	1	4	6	5	7	3	6	6	3	8	6	1	8	1	4	5	2	6	5	3	5	2	1
28
29	2	8	4	8	7	3	3	4	7	5	4	4	4	4	3	5	5	6	5	3	4	3	8	3	3	7	3	4	3	6	7	3	4	5	2	4	6	3	4	3	6	7	6	7	4	6	3	4	4
30	1	8	6	7	7	5	4	5	8	8	3	3	5	5	1	2	6	6	2	1	1	2	7	6	6	7	5	4	1	2	7	5	5	5	5	3	8	5	6	8	4	7	1	7	5	4	6	5	5
31	4	4	7	4	4	5		2	4	6	5	5	4	4	3	5	6	4	6	4	4	4	5	6	6	6	6	6	6	5	8	4	7	6	5	5	8	5	5	6	5	4	5	6	5	5	5	5	5
32	1	8	8	8	8	2	2	1	8	2	8	2	8	8	2	1	2	8	8	2	2	2	8	8	9	8	8	2	2	2	9	2	1	1	2	2	9	2	9	8	2	2	2	8	8	9	2	8	2
33	2	2	7	6	3	2	2	2	7	2	2	6	3	2	2	2	2	6	5	2	2	1	7	3	2	7	6	6	2	3	2	2	6	6	1	2	2	2	2	1	2	2	2	2	6	2	2	2	2
34	2	4	5	3	6	8	8	8	2	8	8	2	8	3	2	8	8	3	2	2	2	2	8	8	8	4	2	5	2	2	8	2	2	2	2	2	2	2	2	2	2	7	2	2	2	8	2	2	2
35	4	5	6	6	6	5	4	4	6	5	6	4	5	7	6	7	6	7	7	6	6	7	9	8	8	6	7	6	5	5	8	7	5	5	5	7	7	5	8	5	6	6	5	8	8	8	6	4	5
36	6	6	6	4	6	5	4	3	3	7	4	3	4	4	2	3	4	7	3	6	6	4	7	7	6	7	1	1	5	8	7	6	4	3	2	2	7	3	6	4	2	6	3	8	7	5	8	3	3
37	2	6	6	6	6	3	4	4	6	5	6	4	4	4	3	4	6	3	4	3	4	2	7	6	6	6	3	5	3	6	8	5	4	6	4	4	7	5	5	4	5	5	5	7	5	5	6	5	5
[truncated: 133 more columns]

## Sheet: Round 3
Participant number	1i. Germs are video game characters—some allies, some foes. There was some disagreement around the appropriateness of this item. Some participants were concerned that video-game references only appeal to a specific demographic, others found this metaphor engaging. The panel median rating for this item was 5.5. Your previous rating for this item was [DELPHIPREVIOUS].	2o. Antibiotic-resistant bacteria are intruders wearing smart armour that upgrades itself when exposed to medicine. Participants liked the general idea of this metaphor, but didn't like the strong war reference. We adapted the previous metaphor (which mentioned war enemies with impentrable armour) to reduce the aggressive tone. The panel median rating for this item was 6. Your previous rating for…	3s. Using antibiotics for viruses is like shouting in the wrong language at a locked door—it won’t open, and you might just make things worse.We re-worded this item following a participant's suggestion.The panel median rating for this item was 5. Your previous rating for this item was [DELPHIPREVIOUS].	7c. Ignoring medical advice is like driving through a red light at a busy crossing - you might survive, but you’re putting others in danger.This item was re-worded following participant feedback to avoid references to law-breaking.The panel median rating for this item was 5. Your previous rating for this item was [DELPHIPREVIOUS].	N1.2. The world of germs is a classroom full of individuals with unique personalities, strengths, and quirks.The median panel rating for this item was 5, your rating was [DELPHIPREVIOUS].	N1.3. Communities of germs are like human neighbourhoods, made up of diverse residents including a few trouble-makers with the potential to cause chaos.Participants warned this metaphor could be problematic because it can unintentionally reinforce social stereotypes, as the idea of "diverse residents" in human neighbourhoods can be linked to marginalised groups. We made a small change to the orig…	N1.4 The world of germs is a library filled with different books, each with its own story, role, and value. Some participants expressed concerns that metaphors comparing bacteria to inanimate objects fail to capture their dynamic, living nature. The median panel rating for this item was 6, your rating was [DELPHIPREVIOUS].	N1.5. Coexisting with germs is a dance—there is no rivalry, only living beings adjusting to each other in rhythm and balance. Participants warned that saying that there's no rivalry underestimates the burden or impact of microorganisms. Others argued that references to ‘dancing’ does not convey the gravitas needed.The median panel rating for this item was 4, your rating was [DELPHIPREVIOUS].	N1.7. Germs are like diverse smartphone apps—most run quietly in the background, others crash the system.Some participants expressed concerns that metaphors comparing bacteria to inanimate objects fail to capture their dynamic, living nature. The median panel rating for this item was 4.5, your rating was [DELPHIPREVIOUS].	N1.9. The world of germs is a puzzle, where many different pieces form a complete picture. Some participants expressed concerns that metaphors comparing bacteria to inanimate objects fail to capture their dynamic, living nature. The median panel rating for this item was 4, your rating was [DELPHIPREVIOUS].	N1.11. The world of germs is a starry sky—countless and varied. The median panel rating for this item was 4, your rating was [DELPHIPREVIOUS].	N1.12. Germs are like spices—perfect in the right dish, but they can ruin the meal if they don’t belong.This metaphor was slightly re-worded following participant feeback.The median panel rating for this item was 6, your rating was [DELPHIPREVIOUS].	N1.13. Germs are as varied as wild animals, living in balance but adapting to survive if threatened.Participants argued that bacteria evolution happens naturally, not only because they feel threatened. We made a small change to this item follow participant feedback and replaced 'fighting back' with 'adapting'.The median panel rating for this item was 6.5, your rating was [DELPHIPREVIOUS].	N2.2. Antibiotic-resistant bacteria are shapeshifters that change form when exposed to antibiotics - just enough to evade our defences. Some participants were concerned that the word 'shapeshifter' may not be universally understood or easily translated. This metaphor was slightly re-worded following participant feedback.The median panel rating for this item was 6, your rating was [DELPHIPREVIOUS].	N2.4. Antibiotic resistance is like a ball elimination game, where bacteria learn the movements of the ball and eventually dodge it entirely.Several participants warned that not everybody will know what Dodgeball is. Based on this feedback, we have replaced the term 'Dodgeball' with a more descriptive term.The median panel rating for this item was 5, your rating was [DELPHIPREVIOUS].	N2.6. Antibiotic resistance is pressure and counter-pressure, where bacteria push back against antibiotic treatment. The median panel rating for this item was 5, your rating was [DELPHIPREVIOUS].	N2.7. Antibiotic-resistant bacteria are like fish that have learned to slip through the holes in our nets.Participants warned that this metaphor could be interpreted as suggesting that the problem lies with the person fishing using the wrong net, rather than with the bacteria developing resistance. The metaphor was slightly reworded following participant feedback.The median panel rating for this …	N2.8. Antibiotic resistance is like a clogged pipe—what once flowed smoothly is now blocked.The median panel rating for this item was 4, your rating was [DELPHIPREVIOUS].	N2.9. Drug-resistant bacteria are a moving target for our antibiotic weapons. Participants criticised the aggressive/warlike sentiment.The median panel rating for this item was 3, your rating was [DELPHIPREVIOUS].	N2.13. Bacteria are escape artists slipping through the cracks in our treatment. The median panel rating for this item was 5, your rating was [DELPHIPREVIOUS].	N2.15. Antibiotic resistance is global warming in medicine.Participants warned this metaphor was very general and that they wouldn’t compare AMR to something that controversially discussed.The median panel rating for this item was 3.5, your rating was [DELPHIPREVIOUS].	N3.3. Using antibiotics for viruses is putting earphones over your eyes.The median panel rating for this item was 6.5, your rating was [DELPHIPREVIOUS].	N3.7. Using antibiotics for minor infections is like using a wrecking ball to dismantle a tentFollowing participant feedback, we revised this item to fit with section 8, which aims to communicate that antibiotics aren’t always required for minor infections.The median panel rating for this item was 3.5, your rating was [DELPHIPREVIOUS].	N3.8. Using antibiotics for viruses is using an umbrella to protect from storm.Participants argued that some people might think an umbrella can protect from wind. Following participant feedback, we changed 'wind' to 'storm' in the metaphor.The median panel rating for this item was 4.5, your rating was [DELPHIPREVIOUS].	N3.9. Using antibiotics for viruses is wearing a thick winter coat for sun protection.Participants warned that some people may not be familiar with very low temperatures. Several also argued that wearing a winter coat for sun protection would actually work, even if uncomfortable.The median panel rating for this item was 4, your rating was [DELPHIPREVIOUS].	N3.10. Using antibiotics for viruses is cleaning your teeth with a hairbrush.The median panel rating for this item was 6, your rating was [DELPHIPREVIOUS].	N4.1. The body is a universe made of many worlds—each microbiome is its own ecosystem, inhabited by bacteria. These bacteria, not the body, adapt and evolve.Many participants thought this metaphor was too complex.The median panel rating for this item was 4.5, your rating was [DELPHIPREVIOUS].	N4.2. Bacteria are tenants in our bodies—some become resistant, refuse to move out or multiply and spread. Participants argued that not all of the infections are caused by microorganisms that are part of the human microbiome. They warned that this metaphor misses the part about infection/transmission from one person or animal to another person or animal.The median panel rating for this item was 6…	N4.4. Bacteria are tourists in our bodies—some break the rules, outstay their welcome and cause trouble. The median panel rating for this item was 4.5, your rating was [DELPHIPREVIOUS].	N4.5. Bacteria are evolving species in a rainforest—the environment stays the same while bacteria adapt over time.Participants argued that changes in the environment also contribute to the development of resistance.The median panel rating for this item was 4, your rating was [DELPHIPREVIOUS].	N5.1. Sharing leftover antibiotics is like lending someone a personally tailored suit.The median panel rating for this item was 3, your rating was [DELPHIPREVIOUS].	N5.3. Sharing leftover antibiotics is like giving someone your prescription glasses.Some participants found this confusing—what's the harm in someone else's glasses if they improve your vision?The median panel rating for this item was 7, your rating was [DELPHIPREVIOUS].	N5.4. Sharing leftover antibiotics is like giving your friend sweets when what they really need is salad.The median panel rating for this item was 3.5, your rating was [DELPHIPREVIOUS].	N5.5. Sharing leftover antibiotics is like serving someone leftovers from two weeks ago.Following participant feedback, we adapted this item to increase the time period of leftover food from 1 week to 2 weeksThe median panel rating for this item was 3, your rating was [DELPHIPREVIOUS].	N5.6. Sharing leftover antibiotics is like sharing your PIN code for someone else’s phone.The median panel rating for this item was 6, your rating was [DELPHIPREVIOUS].	N5.7. Sharing leftover antibiotics is like sending your plumber when someone needs an electrician.The median panel rating for this item was 6, your rating was [DELPHIPREVIOUS].	N5.8. Sharing leftover antibiotics is like giving an adult-sized life jacket to a child.We revised this item following participant feedback (it originally stated giving a child's life jacket to an adult).The median panel rating for this item was 3, your rating was [DELPHIPREVIOUS].	N6.5. An unfinished course of antibiotics is abandoning a train journey half-way.Participants thought this metaphor did not convey a sense of urgency or the seriousness of the threat. The median panel rating for this item was 5, your rating was [DELPHIPREVIOUS].	N6.6. An unfinished course of antibiotics is like quitting school before your final exams.The median panel rating for this item was 5, your rating was [DELPHIPREVIOUS].	N6.7. An unfinished course of antibiotics is like stopping your car in the middle of a busy motorway.The median panel rating for this item was 3.5, your rating was [DELPHIPREVIOUS].	N6.8. An unfinished course of antibiotics is like falling asleep at the cinema and missing the end of the film.Participants thought this metaphor did not convey a sense of urgency or the seriousness of the threat. The median panel rating for this item was 3.5, your rating was [DELPHIPREVIOUS].	N6.9. An unfinished course of antibiotics is like painting only half a wall.Participants thought this metaphor did not convey a sense of urgency or the seriousness of the threat. The median panel rating for this item was 5, your rating was [DELPHIPREVIOUS].	N6.11. An unfinished course of antibiotics is like turning off a video game without saving your progress.Some participants liked how this metaphor made a link to behavioural intent, while others warned that video game analogies don't work for people who have never played them.The median panel rating for this item was 4, your rating was [DELPHIPREVIOUS].	N7.1. Ignoring medical advice is throwing darts in the dark.Participants were concerned that this metaphor may not be universally understandable.The median panel rating for this item was 5.5, your rating was [DELPHIPREVIOUS].	N7.2. Ignoring medical advice is walking around the house at night without turning on the lights.The median panel rating for this item was 5.5, your rating was [DELPHIPREVIOUS].	N7.3. Ignoring medical advice is fixing a car without a mechanic.The median panel rating for this item was 4.5, your rating was [DELPHIPREVIOUS].	N7.4. Ignoring medical advice is trying to build a rocket without an engineer.The median panel rating for this item was 6, your rating was [DELPHIPREVIOUS].	N7.6. Ignoring medical advice is lighting a fire in your kitchen and assuming it won’t spread.The median panel rating for this item was 3, your rating was [DELPHIPREVIOUS].	N7.7. Ignoring medical advice is building a house without a blueprint or an architect.The median panel rating for this item was 4.5, your rating was [DELPHIPREVIOUS].
1	1	9	8	6	5	5	6	7	2	8	7	7	8	8	3	8	8	8	7	7	7	8	8	7	5	7	6	6	7	6	6	8	6	5	7	7	7	8	7	5	7	6	7	6	8	7	7	7	7
2	2	2	2	8	8	8	8	4	5	2	2	8	5	2	5	8	2	2	8	8	2	8	2	2	2	8	2	5	8	2	2	8	2	2	5	8	8	2	2	2	2	2	2	5	2	2	2	5	2
3	8	8	8	6	7	7	8	1	2	2	5	7	8	7	6	6	6	6	2	2	1	8	1	2	2	8	2	8	7	5	6	9	2	2	8	3	2	8	8	2	1	7	2	8	7	2	8	2	3
4	6	6	3	6	5	4	5	4	4	4	4	6	5	7	3	3	6	3	3	5	4	7	7	3	4	6	4	5	5	5	3	5	4	4	6	4	3	4	5	4	5	5	4	5	4	4	4	4	4
5	8	2	1	8	2	2	2	1	1	8	2	2	8	2	8	2	8	2	2	2	1	8	9	2	8	8	1	1	1	2	8	8	2	9	2	8	2	2	2	2	8	9	2	7	9	2	8	2	9
6	4	7	6	9	4	7	7	3	6	2	2	8	7	2	2	2	7	2	2	2	2	6	2	2	2	4	1	1	2	4	3	9	2	6	8	8	3	8	8	8	2	2	2	2	8	8	9	2	2
7	2	2	5	2	2	9	7	2	5	2	2	6	8	8	2	2	2	2	2	7	2	8	2	1	1	8	2	5	5	4	2	2	2	6	8	6	2	5	8	2	8	5	8	8	5	2	8	2	2
8	9	7	1	8	8	7	8	1	1	8	8	9	8	7	1	8	1	1	2	2	1	9	2	7	2	8	8	8	2	2	1	7	2	1	8	8	2	1	8	1	1	8	2	1	8	1	8	1	1
9	2	2	2	2	8	7	7	2	2	2	2	7	9	2	1	1	2	1	1	2	1	2	1	1	1	7	7	7	1	2	1	1	2	3	7	9	2	1	1	1	1	1	1	2	7	2	8	1	2
10	6	7	6	5	6	7	6	5	6	6	4	6	5	5	5	4	6	5	2	6	5	4	4	4	3	4	6	7	6	3	3	3	3	2	3	6	2	2	3	3	3	6	3	6	4	3	7	2	3
11	1	8	1	1	9	9	9	1	1	9	9	1	9	9	9	8	1	1	1	8	1	1	9	1	1	1	9	1	1	9	1	1	1	9	1	7	9	1	1	8	1	1	1	1	1	9	1	1	8
12	6	6	5	6	5	6	6	5	5	5	5	6	6	6	6	5	5	5	4	5	4	6	4	5	5	6	5	7	4	5	4	6	3	3	5	6	4	6	5	5	4	6	4	5	5	5	6	4	5
13	8	8	2	8	8	8	2	2	2	2	2	2	2	8	2	7	2	2	8	8	2	2	8	2	2	8	8	2	8	2	1	7	2	2	7	7	2	8	2	2	2	2	2	2	1	7	1	1	8
14	7	7	7	8	8	6	6	5	6	7	7	8	6	7	6	6	6	7	7	6	7	7	6	5	4	5	7	7	6	6	7	7	6	6	6	6	5	6	6	6	6	5	5	7	6	5	6	4	5
15	3	6	4	5	6	5	8	5	4	6	6	6	6	5	3	3	4	3	4	4	1	5	4	4	4	6	5	6	4	5	4	8	6	4	7	6	5	7	7	6	6	5	5	4	5	6	6	5	5
16	2	8	2	2	8	7	8	2	7	2	7	2	2	2	1	7	3	1	1	2	2	3	1	3	1	7	1	1	1	1	1	1	2	7	2	2	7	1	1	1	1	1	1	7	2	1	7	1	3
17	6	7	4	8	6	7	6	4	8	5	4	7	7	7	6	6	7	6	5	7	4	7	6	5	5	7	5	6	5	4	5	7	5	5	5	7	6	5	5	4	4	5	5	5	5	5	6	6	6
18	5	4	4	4	7	6	6	5	6	6	7	7	6	6	5	7	6	6	2	6	6	7	7	6	7	7	2	7	5	6	2	3	4	7	4	7	2	2	3	2	3	5	7	7	2	3	6	7	7
19	1	9	1	8	1	1	1	1	1	1	1	8	8	5	5	1	1	1	5	2	1	1	1	9	1	1	9	1	1	1	1	1	1	6	1	1	7	1	1	1	1	1	1	1	1	1	1	9	1
20	6	7	5	6	5	7	6	3	5	4	3	4	7	2	3	7	7	3	3	6	4	7	3	8	4	8	3	6	5	3	3	6	6	3	6	6	3	7	5	4	4	5	4	6	6	4	7	2	3
21	5	5	6	5	4	5	6	3	4	4	4	4	6	4	5	4	4	4	3	4	4	5	4	4	5	5	6	5	4	5	3	6	4	3	5	5	5	6	6	5	4	5	4	6	4	5	6	4	4
22	3	6	4	4	3	4	3	3	3	3	3	4	6	3	3	3	3	3	2	3	3	3	3	3	3	3	4	6	3	3	4	4	3	3	3	4	3	3	3	3	3	3	3	3	6	3	3	3	3
23	6	7	3	3	7	6	7	4	6	3	4	6	8	6	5	1	5	4	7	7	2	6	4	5	4	6	2	2	3	5	3	6	2	5	8	3	3	6	6	7	5	5	6	5	6	7	7	3	7
24	7	8	1	7	2	8	2	8	2	7	2	8	8	8	2	7	8	1	9	8	7	2	8	2	2	7	8	8	1	7	2	8	1	1	8	8	7	8	7	8	2	2	2	8	8	8	1	1	8
25
26	9	1	8	8	2	8	9	1	2	2	2	2	8	2	8	8	2	8	1	2	2	9	8	2	2	8	2	2	8	2	9	2	8	2	2	8	2	9	2	8	2	2	9	2	8	1	2	8	8
27	2	1	3	3	2	8	3	4	4	3	3	7	8	3	6	6	6	5	2	7	2	7	3	5	3	3	3	6	1	2	2	3	1	2	2	2	2	3	3	3	3	3	3	7	4	7	7	3	7
28
29	8	8	3	8	3	7	3	3	4	3	3	4	7	7	7	2	4	3	3	5	3	6	3	7	3	2	3	3	4	4	2	3	3	4	8	8	3	3	3	3	3	3	8	3	6	7	8	2	4
30	8	7	2	8	2	2	2	2	2	2	2	8	8	8	7	2	7	3	1	3	3	8	8	3	1	9	2	2	2	1	3	8	3	8	7	7	8	3	3	8	3	3	7	3	3	7	7	2	7
31
32
33	7	5	2	4	4	4	3	2	4	2	2	2	5	5	2	2	4	2	2	2	2	2	3	2	2	1	2	2	2	2	2	2	2	2	2	4	2	2	2	2	2	2	2	2	2	2	2	2	2
34	2	8	8	2	2	8	2	9	2	2	8	8	8	6	8	2	8	2	2	3	9	2	8	2	8	8	8	2	2	2	2	2	2	7	2	2	2	2	2	2	2	2	2	3	3	8	8	3	8
35	6	7	8	5	4	4	6	3	4	4	4	5	4	3	6	4	4	4	3	4	3	7	3	3	5	4	4	6	6	4	4	6	6	4	7	6	5	4	9	4	4	4	7	4	6	4	4	4	4
36	2	2	8	7	7	8	9	8	2	7	8	6	9	7	7	7	7	7	1	7	7	8	1	7	1	7	8	7	8	6	8	9	8	7	8	7	2	2	7	3	3	3	3	7	7	8	8	8	8
37	5	7	6	9	7	7	7	5	7	7	7	6	7	6	7	6	7	5	2	5	5	7	4	6	3	4	4	6	5	8	3	7	3	6	7	6	5	4	5	5	3	5	5	4	6	5	7	7	5
[truncated: 18 more columns]
